# Supplementary material
Source: publisher site journal article supplement (https://www.dovepress.com/article/615155)
Supplement: Supplementary file 1 [file 615155%20Supplementary%20Material.docx]

Supplementary Table 1. Multivariable logistic regression analysis of HPV, HR-HPV, and LR-HPV infections by ethnicity, adjusted for age.

| Outcome | Comparison | Adjusted-OR (95%CI) | P_value | FDR_P_value | Bonferroni_P_value | Global_P_value |
| --- | --- | --- | --- | --- | --- | --- |
| HPV_infection | Uyghur vs Han | 0.65 (0.52-0.80) | <0.001 | <0.001 | <0.001 | <0.001 |
| HPV_infection | Kazakh vs Han | 1.47 (0.92-2.27) | 0.094 | 0.094 | 0.282 | <0.001 |
| HPV_infection | Hui vs Han | 0.61 (0.38-0.95) | 0.038 | 0.057 | 0.114 | <0.001 |
| HR_HPV_infection | Uyghur vs Han | 0.69 (0.54-0.87) | 0.002 | 0.005 | 0.005 | 0.003 |
| HR_HPV_infection | Kazakh vs Han | 1.34 (0.80-2.16) | 0.240 | 0.240 | 0.720 | 0.003 |
| HR_HPV_infection | Hui vs Han | 0.73 (0.44-1.15) | 0.197 | 0.240 | 0.591 | 0.003 |
| LR_HPV_infection | Uyghur vs Han | 0.54 (0.32-0.89) | 0.018 | 0.053 | 0.053 | 0.004 |
| LR_HPV_infection | Kazakh vs Han | 1.80 (0.67-4.04) | 0.189 | 0.189 | 0.567 | 0.004 |
| LR_HPV_infection | Hui vs Han | 0.16 (0.01-0.75) | 0.073 | 0.110 | 0.220 | 0.004 |

Supplementary Table 2. Comparison of HR-HPV genotype distributions across ethnic groups with correction for multiple testing.

| Genotype | Chi_square | Raw_P_value | FDR_P_value | Bonferroni_P_value | Significance_after_FDR |
| --- | --- | --- | --- | --- | --- |
| HPV16 | 17.831 | 0.001 | 0.023 | 0.023 | Significant |
| HPV18 | 10.124 | 0.038 | 0.121 | 0.653 | Not significant |
| HPV31 | 12.347 | 0.015 | 0.064 | 0.254 | Not significant |
| HPV33 | 4.562 | 0.335 | 0.407 | 1.000 | Not significant |
| HPV35 | 6.782 | 0.148 | 0.251 | 1.000 | Not significant |
| HPV39 | 2.341 | 0.673 | 0.715 | 1.000 | Not significant |
| HPV45 | 8.764 | 0.067 | 0.143 | 1.000 | Not significant |
| HPV51 | 8.452 | 0.076 | 0.144 | 1.000 | Not significant |
| HPV52 | 9.874 | 0.043 | 0.121 | 0.724 | Not significant |
| HPV53 | 3.451 | 0.485 | 0.550 | 1.000 | Not significant |
| HPV56 | 6.234 | 0.182 | 0.282 | 1.000 | Not significant |
| HPV58 | 12.341 | 0.015 | 0.064 | 0.255 | Not significant |
| HPV59 | 8.764 | 0.067 | 0.143 | 1.000 | Not significant |
| HPV66 | 1.231 | 0.873 | 0.873 | 1.000 | Not significant |
| HPV68 | 5.672 | 0.225 | 0.319 | 1.000 | Not significant |
| HPV73 | 15.673 | 0.003 | 0.030 | 0.059 | Significant |
| HPV82 | 4.562 | 0.335 | 0.407 | 1.000 | Not significant |
